# Supplementary material
Source: PubMed Central journal article supplement (PMC544502)
Supplement: plntcell_tpc.104.027516_1.pdf [file plntcell_tpc.104.027516_1.pdf]

## atpF intron: 111 nt subdomain of Domain I

|            | 450            | 460                                                                           | 470                       | 480                  | 490 | 500 | 510 | 520 | 530 | 540 | 550 |
|------------|----------------|-------------------------------------------------------------------------------|---------------------------|----------------------|-----|-----|-----|-----|-----|-----|-----|
| Wheat      | : UUUGAAGAAAAA | AA--AAGAAUUCUAUUAUUUUUCAUUUUCCAUUUAUUUAGUUAGUUUUUCUUAUGAAAUUGAAAUUAUUA        | --AG-                     | AGGGCAAAUAAAAUAAAGAA |     |     |     |     |     |     |     |
| Barley     | : UUUGAAGAAAAA | AG--AAGAAUUCUAUUAUUUUUCAUUUUCCAUUUAUUUAGUUAGUUUUUCUUAUGAAAUUGAAAUUAUUAACUAA   | --AGGGCAAAUAAAAUAAAGAA    |                      |     |     |     |     |     |     |     |
| Rice       | : UUUGAAGAAAAA | --GU--AGGAAUUCUAUCCAUUUUUCAUUUUCCAUUUUUCUAUUAGUUUUUCUUAUGAAAUUGAAAUUUUAACUAA  | ACAGAGCAAAACAAAAUAAAGAA   |                      |     |     |     |     |     |     |     |
| Maize      | : UUUGAAGAAAAA | UAAA--AGGAAUUCUAUCAUUUUUCAUUUUCCAUUUAUUUAGUUAGUUUUUCUUAUGAAAUUGAAAUUAUUAACUAA | --AGGGCAAAUACAAAAUAAAAA   |                      |     |     |     |     |     |     |     |
| Spinach    | : UUUGAAUAAAAA | AAAA--CAACUUUGCUGACAAUACUU--AUAUAUUUUUUUUUGGGGGGUCAGAAAGAGUUCUCCGAAU          | -----                     |                      |     |     |     |     |     |     |     |
| Tobacco    | : UUUGAAAAA    | AAAAAAGAAACAACUUUGCUGACAAUAC--AUAUUUUUUUUUUU                                  | -----GUCAGAAAGAUCCUCCGAAU |                      |     |     |     |     |     |     |     |
| Arabidopsi | : UUUCAAGAAAAA | AGAA--ACAACUUUGCUGACAAUUAU                                                    | -----UAAUUUUUCAUUG        |                      |     |     |     |     |     |     |     |

## atpF intron: Domain IV

|            | 680              | 690                                 | 700                | 710        | 720           | 730         | 730       |
|------------|------------------|-------------------------------------|--------------------|------------|---------------|-------------|-----------|
| Wheat      | : GCUCAUUACUUA   | -----AAAAAAGAUUUGGAAAUUA            | -GCUAUAGAA         | -----AAAAA | AAAAA         | AAAAA       | UAGGAGC   |
| Barley     | : GCUCAUUACUUA   | UACUUA                              | AAAAAAGAUUUGGAAAUU | -GCUAUAGCA | -----AAAAA    | AAAAA       | -AAGGAGC  |
| Rice       | : GCUCAUUACAUU   | -----AAAAA                          | AUAUUGGAAGUA       | -GCCAUAGCA | -----AAAAA    | AAAAA       | -AGGAGC   |
| Maize      | : GCUCAUUACAUUA  | -----AAAAA                          | AAGAUUUGGAAAUUA    | -GCCAUAAUA | CAUAAC        | -AAAAA      | AAGGAGC   |
| Spinach    | : GUUCAUUACAUUC  | -----AAAAA                          | AAGAUUUGGAAAUUUG   | CCAUAAAA   | AAUUG         | --AAGUAAUUG | AGCGUGAGC |
| Tobacco    | : GCUCAUUACAUUCA | --UAAAAA                            | AAGAUUUGGAAAUUUA   | CCUUAAGU   | -----AAUUG    | AGCGUGA     | ----GAGC  |
| Arabidopsi | : GCUCAUUGCAUGAA | -----AAAGAUGGGGAAAGGGAAGUCUCAUAAAAU | AAUUGA             | UUGGAAUUA  | AGUGAGCAUGAGC |             |           |
